# Supplementary material for: The combination of elbasvir and grazoprevir for the treatment of chronic HCV infection in Japanese patients: a randomized phase II/III study
Source: Springer Nature journal article supplement (doi:10.1007/s00535-016-1285-y), 2016-11-21
Supplement: MOESM1 [file 11068378]

**Electronic Supplemental Material for *The Journal of Gastroenterology***

The Combination of Elbasvir and Grazoprevir for the Treatment of Chronic HCV Infection in Japanese Patients: A Randomized Phase II/III Study

Hiromitsu Kumada · Yoshiyuki Suzuki · Yoshiyasu Karino · Kazuaki Chayama · Norifumi Kawada ·

Takeshi Okanoue · Yoshito Itoh · Satoshi Mochida · Hidenori Toyoda · Hitoshi Yoshiji · Shintaro

Takaki · Naoyoshi Yatsuzuka · Etsuo Yodoya · Takashi Iwasa · Go Fujimoto · Michael N.

Robertson · Stuart Black · Luzelena Caro · Janice Wahl

**Corresponding Author:** Naoyoshi Yatsuzuka, naoyoshi\_yatsuzuka@merck.com

**Table S1** Prevalence of baseline NS3 and NS5A RAVs in parts 1 and 2

| Population                     | Total number of patients | Number of patients with sequences available | Number of patients With RAVs    |                             | Baseline RAVs (number of patients with variants detected)                                                                                                                                                                               |
|--------------------------------|--------------------------|---------------------------------------------|---------------------------------|-----------------------------|-----------------------------------------------------------------------------------------------------------------------------------------------------------------------------------------------------------------------------------------|
|                                |                          |                                             | RAVs not detected, <i>n</i> (%) | RAVs detected, <i>n</i> (%) |                                                                                                                                                                                                                                         |
| <b>NS3 RAVs</b>                |                          |                                             |                                 |                             |                                                                                                                                                                                                                                         |
| Overall                        | 321                      | 321                                         | 218 (67.9)                      | 103 (32.1)                  | D168D/E (3), D168E (2), M175L (2), M175L/M (1), Q80K (4), S122G (57), S122S/G (13), S122T/A (1), S122T/S/A/G (1), T54S (12), T54S/T (1), V107I (1), V107I/V (1), V158I (1), V170I/M/V (2), V170I/T (1), V170I/V (8), V36L (1), V55A (1) |
| <b>By genotype and subtype</b> |                          |                                             |                                 |                             |                                                                                                                                                                                                                                         |
| GT1a                           | 5                        | 5                                           | 3 (60.0)                        | 2 (40.0)                    | Q80K (2)                                                                                                                                                                                                                                |
| GT1b                           | 316                      | 316                                         | 215 (68.0)                      | 101 (32.0)                  | D168D/E (3), D168E (2), M175L (2), M175L/M (1), Q80K (2), S122G (57), S122S/G (13), S122T/A (1), S122T/S/A/G (1), T54S (12), T54S/T (1), V107I (1),                                                                                     |

|                                |     |     |            |           |                                                                                                                     |
|--------------------------------|-----|-----|------------|-----------|---------------------------------------------------------------------------------------------------------------------|
|                                |     |     |            |           | V107I/V (1), V158I (1), V170I/M/V (2), V170I/T (1), V170I/V (8), V36L (1), V55A (1)                                 |
| <b>NS5A RAVs</b>               |     |     |            |           |                                                                                                                     |
| Overall                        | 321 | 321 | 263 (81.9) | 58 (18.1) | L31L/I/M (1), L31L/M (1), L31M (11), L31V (1), M28M/V (1), R30H (1), R30Q/R (1), Y93H (22), Y93Y/C (2), Y93Y/H (19) |
| <b>By genotype and subtype</b> |     |     |            |           |                                                                                                                     |
| GT1a                           | 5   | 5   | 3 (60.0)   | 2 (40.0)  | M28M/V (1), Y93Y/C (1)                                                                                              |
| GT1b                           | 316 | 316 | 260 (82.3) | 56 (17.7) | L31L/I/M (1), L31L/M (1), L31M (11), L31V (1), R30H (1), R30Q/R (1), Y93H (22), Y93Y/C (1), Y93Y/H (19)             |

RAVs resistance-associated variants, *GT*, genotype
