# Supplementary material for: The combination of elbasvir and grazoprevir for the treatment of chronic HCV infection in Japanese patients: a randomized phase II/III study
Source: Springer Nature journal article supplement (doi:10.1007/s00535-016-1285-y), 2016-11-21
Supplement: MOESM2 [file 11068378]

The Combination of Elbasvir and Grazoprevir for the Treatment of Chronic HCV Infection in Japanese Patients: A Randomized Phase II/III Study

Hiromitsu Kumada · Yoshiyuki Suzuki · Yoshiyasu Karino · Kazuaki Chayama · Norifumi Kawada · Takeshi Okanoue · Yoshito Itoh · Satoshi Mochida · Hidenori Toyoda · Hitoshi Yoshiji · Shintaro Takaki · Naoyoshi Yatsuzuka · Etsuo Yodoya · Takashi Iwasa · Go Fujimoto · Michael N. Robertson · Stuart Black · Luzelena Caro · Janice Wahl

**Corresponding Author:** Naoyoshi Yatsuzuka, naoyoshi\_yatsuzuka@merck.com

**Table S2** Impact of baseline NS3 and NS5A RAVs on SVR12 in parts 1 and 2

| Population                     | SVR12, n/N (%)                             |                   |                 |
|--------------------------------|--------------------------------------------|-------------------|-----------------|
|                                | Overall efficacy in patients with sequence | RAVs not detected | RAVs detected   |
| <b>NS3 RAVs</b>                |                                            |                   |                 |
| Overall                        | 314/321 (97.8)                             | 211/218 (96.8)    | 103/103 (100.0) |
| <b>By genotype and subtype</b> |                                            |                   |                 |
| GT1a                           | 5/5 (100.0)                                | 3/3 (100.0)       | 2/2 (100.0)     |
| GT1b                           | 309/316 (97.8)                             | 208/215 (96.7)    | 101/101 (100.0) |
| <b>NS5A RAVs</b>               |                                            |                   |                 |
| Overall                        | 314/321 (97.8)                             | 260/263 (98.9)    | 54/58 (93.1)    |

| <b>By genotype and subtype</b> |                |                |              |
|--------------------------------|----------------|----------------|--------------|
| GT1a                           | 5/5 (100.0)    | 3/3 (100.0)    | 2/2 (100.0)  |
| GT1b                           | 309/316 (97.8) | 257/260 (98.8) | 52/56 (92.9) |

RAVs resistance-associated variants, *GT*, genotype
