# Supplementary material for: The combination of elbasvir and grazoprevir for the treatment of chronic HCV infection in Japanese patients: a randomized phase II/III study
Source: Springer Nature journal article supplement (doi:10.1007/s00535-016-1285-y), 2016-11-21
Supplement: MOESM3 [file 11068378]

The Combination of Elbasvir and Grazoprevir for the Treatment of Chronic HCV Infection in Japanese Patients: A Randomized Phase II/III Study

Hiromitsu Kumada · Yoshiyuki Suzuki · Yoshiyasu Karino · Kazuaki Chayama · Norifumi Kawada · Takeshi Okanoue · Yoshito Itoh · Satoshi Mochida · Hidenori Toyoda · Hitoshi Yoshiji · Shintaro Takaki · Naoyoshi Yatsuzuka · Etsuo Yodoya · Takashi Iwasa · Go Fujimoto · Michael N. Robertson · Stuart Black · Luzelena Caro · Janice Wahl

**Corresponding Author:** Naoyoshi Yatsuzuka, naoyoshi\_yatsuzuka@merck.com

**Table S3** RAVs in 7 patients with virologic failure

| Patient | GT | Day 1 |               | At failure |                    |
|---------|----|-------|---------------|------------|--------------------|
|         |    | NS3   | NS5A          | NS3        | NS5A               |
| 110182  | 1b | WT    | <b>Y93Y/H</b> | WT         | L31M, <b>Y93H</b>  |
| 105810  | 1b | WT    | WT            | WT         | Y93H               |
| 105330  | 1b | WT    | <b>L31M</b>   | WT         | <b>L31M</b> , Y93H |
| 110313  | 1b | WT    | WT            | WT         | Y93H <sup>a</sup>  |
| 105135  | 1b | WT    | <b>Y93H</b>   | WT         | <b>Y93H</b>        |
| 105804  | 1b | WT    | <b>Y93H</b>   | WT         | L31M, <b>Y93H</b>  |
| 105136  | 1b | WT    | WT            | WT         | L31M, Y93H         |

GT genotype, HCV hepatitis C virus, RAVs resistance-associated variants, WT wild-type

<sup>a</sup> At time of failure (follow-up week 4), HCV RNA was insufficient (<3 log IU/mL) for RAV analysis in this patient. At follow up week 12, HCV RNA was sufficient to detect Y93H
